# Supplementary material for: Effect of Traditional Cooking and In Vitro Gastrointestinal Digestion of the Ten Most Consumed Beans from the Fabaceae Family in Thailand on Their Phytochemicals, Antioxidant and Anti-Diabetic Potentials
Source: MDPI journal article supplement (doi:10.3390/plants11010067), 2021-12-26
Supplement: s1 [file s1]

# Supplementary Materials

## Effect of Traditional Cooking and *In Vitro* Gastrointestinal Digestion of the Ten Most Consumed Beans from the Fabaceae Family in Thailand on Their Phytochemicals, Antioxidant and Anti-Diabetic Potentials

Duangjai Tungmunnithum <sup>1,2,3,\*</sup>, Samantha Drouet <sup>2</sup>, Jose Manuel Lorenzo <sup>4,5</sup> and Christophe Hano <sup>2,3,\*</sup>

<sup>1</sup> Department of Pharmaceutical Botany, Faculty of Pharmacy, Mahidol University, Bangkok 10400, Thailand

<sup>2</sup> Laboratoire de Biologie des Ligneux et des Grandes Cultures, INRAE USC1328, Campus Eure et Loir, Orleans University, 28000 Chartres, France; samantha.drouet@univ-orleans.fr

<sup>3</sup> Le Studium Institut for Advanced Studies, 1 Rue Dupanloup, 45000 Orleans, France

<sup>4</sup> Centro Tecnológico de la Carne de Galicia, Adva. Galicia nº 4, Parque Tecnológico de Galicia, San Cibrao das Viñas, 32900 Ourense, Spain; jmlorenzo@ceteca.net

<sup>5</sup> Área de Tecnología de los Alimentos, Facultad de Ciencias de Ourense, Universidad de Vigo, 32004 Ourense, Spain

\* Correspondence: duangjai.tun@mahidol.ac.th (D.T.) ; hano@univ-orleans.fr (C.H.)

**Table S1.** The collected 10 taxa of the Fabaceae beans species cover the whole floristic regions in Thailand.

**Table S2:** Pearson correlation coefficient linking phytochemicals antioxidant and anti-diabetic activities of extracts from beans from ten Fabaceae species subjected to traditional cooking and in vitro gastrointestinal digestion.

**Table S1.** The collected 10 taxa of the Fabaceae beans species cover the whole floristic regions in Thailand.

| Taxon No. | Scientific Name                                      | Floristic regions | Localities       |
|-----------|------------------------------------------------------|-------------------|------------------|
| 1         | <i>Pisum sativum</i>                                 | N                 | Lampang          |
|           |                                                      | PEN               | Surat Thani      |
| 2         | <i>Cajanus cajan</i>                                 | SW                | Chumphon         |
|           |                                                      | E                 | Yasothon         |
| 3         | <i>Vigna unguiculata</i>                             | C                 | Chainat          |
| 4         | <i>Vigna unguiculata</i> subsp. <i>sesquipedalis</i> | N                 | Lampang          |
|           |                                                      | N                 | Chiang Mai       |
|           |                                                      | N                 | Nakhon Sawan     |
|           |                                                      | E                 | Chaiyaphum       |
| 5         | <i>Vigna radiata</i>                                 | N                 | Lamphun          |
|           |                                                      | N                 | Lampang          |
|           |                                                      | N                 | Chiang Mai       |
|           |                                                      | N                 | Nakhon Sawan     |
|           |                                                      | E                 | Buriram          |
| 6         | <i>Vigna mungo</i>                                   | E                 | Ubon Ratchathani |
|           |                                                      | N                 | Sukhothai        |
|           |                                                      | NE                | Nakhon Phanom    |
|           |                                                      | E                 | Ubon Ratchathani |
|           |                                                      | N                 | Phichit          |
| 7         | <i>Vigna angularis</i>                               | SW                | Uthai Thani      |
|           |                                                      | C                 | Lop Buri         |
|           |                                                      | SW                | Kanchanaburi     |
|           |                                                      | SW                | Phetchaburi      |
|           |                                                      | SE                | Chanthaburi      |
|           |                                                      | SE                | Prachin Buri     |
| 8         | <i>Phaseolus vulgaris</i>                            | C                 | Ang Thong        |
|           |                                                      | NE                | Phetchabun       |
|           |                                                      | SE                | Prachin Buri     |
|           |                                                      | N                 | Phichit          |
|           |                                                      | N                 | Phitsanulok      |
|           |                                                      | C                 | Chainat          |
|           |                                                      | N                 | Chiang Mai       |
|           |                                                      | N                 | Chiang Rai       |
|           |                                                      | N                 | Mae Hong Son     |
|           |                                                      | SE                | Trat             |
|           |                                                      | N                 | Tak              |
|           |                                                      | SW                | Uthai Thani      |
| 9         | <i>Glycine max</i>                                   | C                 | Suphan Buri      |
|           |                                                      | C                 | Pathum Thani     |
|           |                                                      | N                 | Chiang Mai       |
|           |                                                      | NE                | Kalasin          |
|           |                                                      | NE                | Loei             |
|           |                                                      | N                 | Uttaradit        |
| 10        | <i>Arachis hypogaea</i>                              | N                 | Kamphaeng Phet   |
|           |                                                      | N                 | Nan              |
|           |                                                      | N                 | Nan              |

|    |              |
|----|--------------|
| NE | Phetchabun   |
| N  | Phayao       |
| E  | Surin        |
| C  | Nakhon Nayok |

---

**Table S2:** Pearson correlation coefficient linking phytochemicals antioxidant and anti-diabetic activities of extracts from beans from ten Fabaceae species subjected to traditional cooking and *in vitro* gastrointestinal digestion.

|            | TPC       | TFC       | TAC       | DPPH      | ABTS      | FRAP      | CAA       | vespAGE   | pentAGE   | AMYL      | GLUC      |
|------------|-----------|-----------|-----------|-----------|-----------|-----------|-----------|-----------|-----------|-----------|-----------|
| TPC        |           |           |           |           |           |           |           |           |           |           |           |
| TFC        | 0.730 *** |           |           |           |           |           |           |           |           |           |           |
| TAC        | 0.464 **  | 0.775 **  |           |           |           |           |           |           |           |           |           |
| DPPH       | 0.552 **  | 0.596 **  | 0.627 *** |           |           |           |           |           |           |           |           |
| ABTS       | 0.463 *   | 0.598 *** | 0.719 *** | 0.888 *** |           |           |           |           |           |           |           |
| FRAP       | 0.766 *** | 0.747 *** | 0.572 *** | 0.640 *** | 0.618 *** |           |           |           |           |           |           |
| CAA        | 0.638 *** | 0.545 **  | 0.467 *** | 0.506 *** | 0.537 **  | 0.769 *** |           |           |           |           |           |
| vespAGE    | 0.847 *** | 0.591 *** | 0.333 ns  | 0.432 *   | 0.354 ns  | 0.699 *** | 0.751 *** |           |           |           |           |
| pentAGE    | 0.691 *** | 0.731 *** | 0.536 *   | 0.452 *   | 0.478 *** | 0.645 *** | 0.718 *** | 0.788 *** |           |           |           |
| AMYL       | 0.829 *** | 0.863 *** | 0.611 *** | 0.646 *** | 0.580 **  | 0.897 *** | 0.790 *** | 0.789 *** | 0.768 *** |           |           |
| GLUC       | 0.855 *** | 0.808 *** | 0.477 **  | 0.476 *** | 0.418 *   | 0.784 *** | 0.686 *** | 0.880 *** | 0.863 **  | 0.8928 ** |           |
| Glc uptake | 0.689 *** | 0.581 *** | 0.265 ns  | 0.256 ns  | 0.237 ns  | 0.495 ns  | 0.530 *   | 0.809 *   | 0.848 **  | 0.605 **  | 0.876 *** |

\*\*\* significant  $p < 0.001$ ; \*\* significant  $p < 0.01$ ; \* significant  $p < 0.05$ ; ns: non-significant  $p > 0.05$ . TPC: total phenolic content; TFC: total flavonoid content; MAC: monomeric anthocyanin content; DPPH: in vitro antioxidant DPPH assay; ABTS: in vitro antioxidant ABTS assay; FRAP: in vitro antioxidant FRAP assay; CAA: cellular antioxidant assay; vespAGE: inhibition of vesperlysine-like AGEs formation; pentAGE: inhibition of pentosidine-like AGEs formation; AMYL: inhibition of  $\alpha$ -amylase activity; GLUC: inhibition of  $\alpha$ -glucosidase activity; Glc uptake: increase of cellular glucose uptake.
